# Supplementary material for: Treatment of Cutaneous Melanoma Harboring SMO p.Gln216Arg Mutation with Imiquimod: An Old Drug with New Results
Source: MDPI journal article supplement (doi:10.3390/jpm11030206), 2021-03-14

**Figure 1**

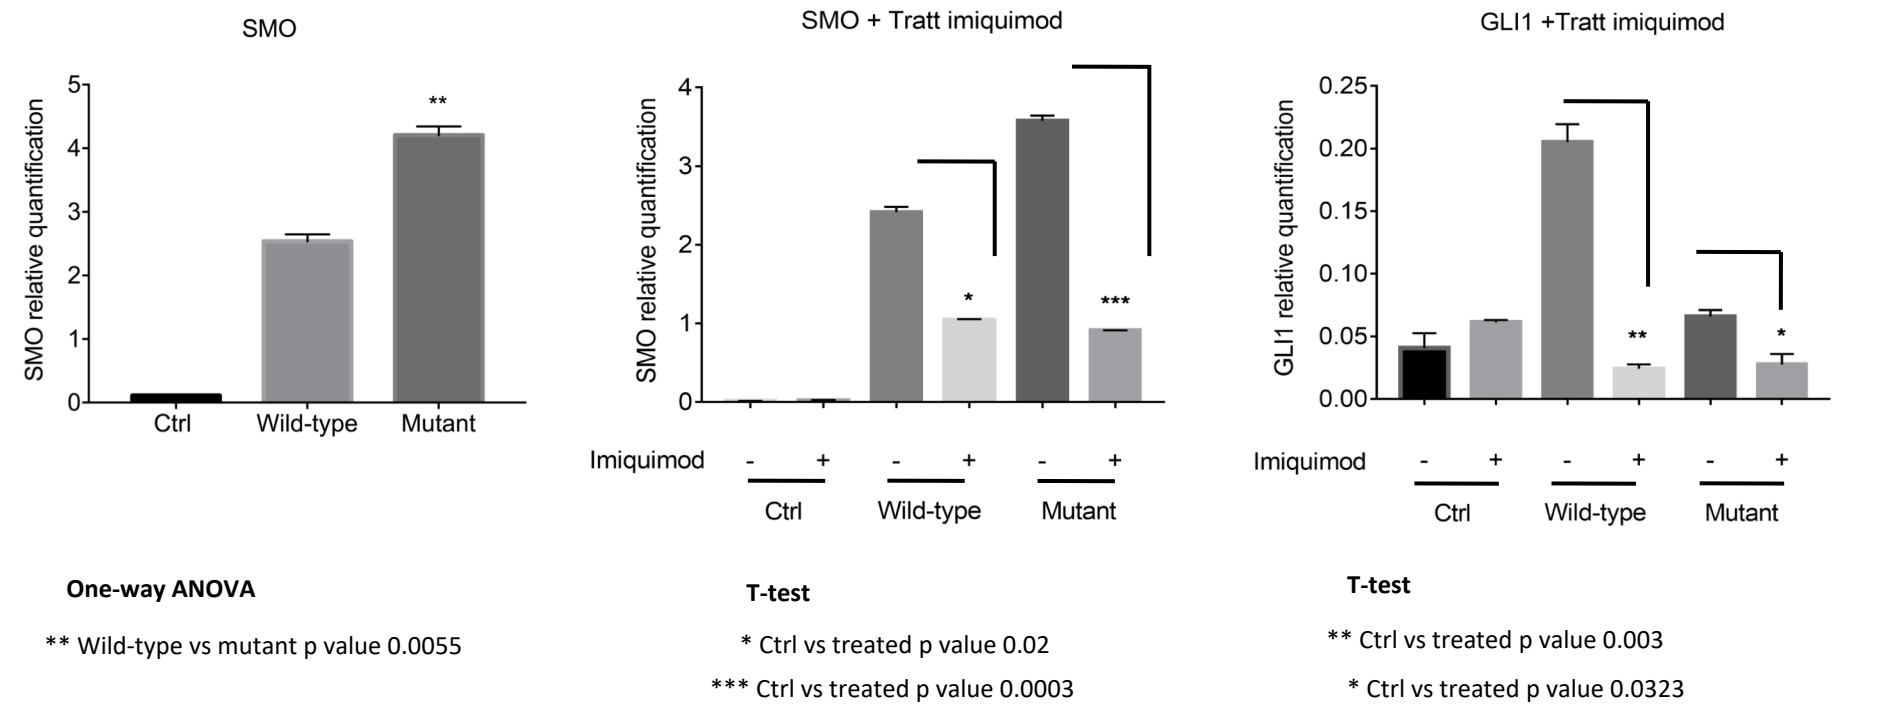

Figure 2

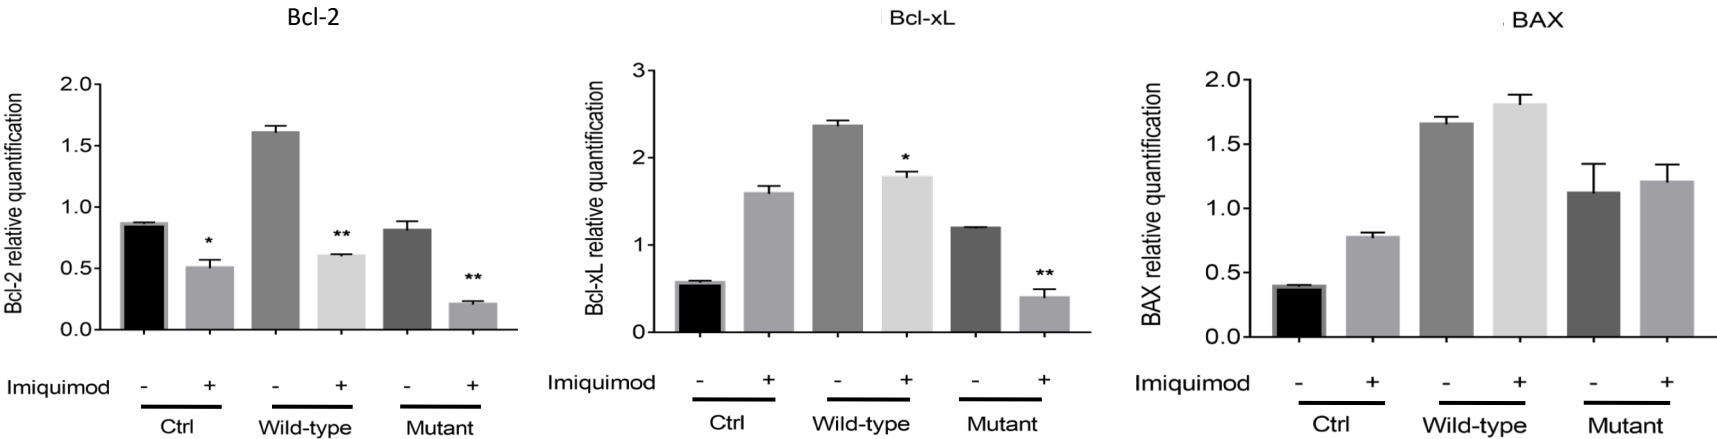

T-test

- \* Ctrl vs treated p value 0.018
- \*\* Ctrl vs treated p value 0.0017
- \*\* Ctrl vs treated p value 0.0090

T-test

- \* Ctrl vs treated p value 0.013
- \*\* Ctrl vs treated p value 0.0081

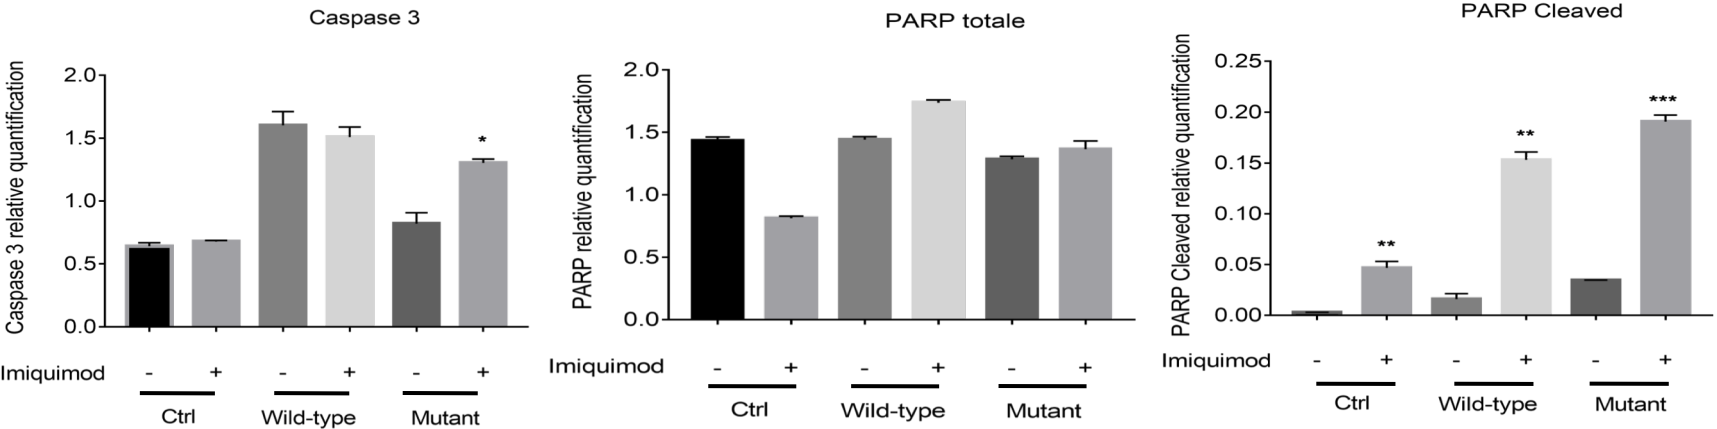

T-test

- \* Ctrl vs treated p value 0.0179

T-test

- \*\* Ctrl vs treated p value 0.0098
- \*\* Ctrl vs treated p value 0.0023
- \*\*\* Ctrl vs treated p value 0.0008

Figure 3

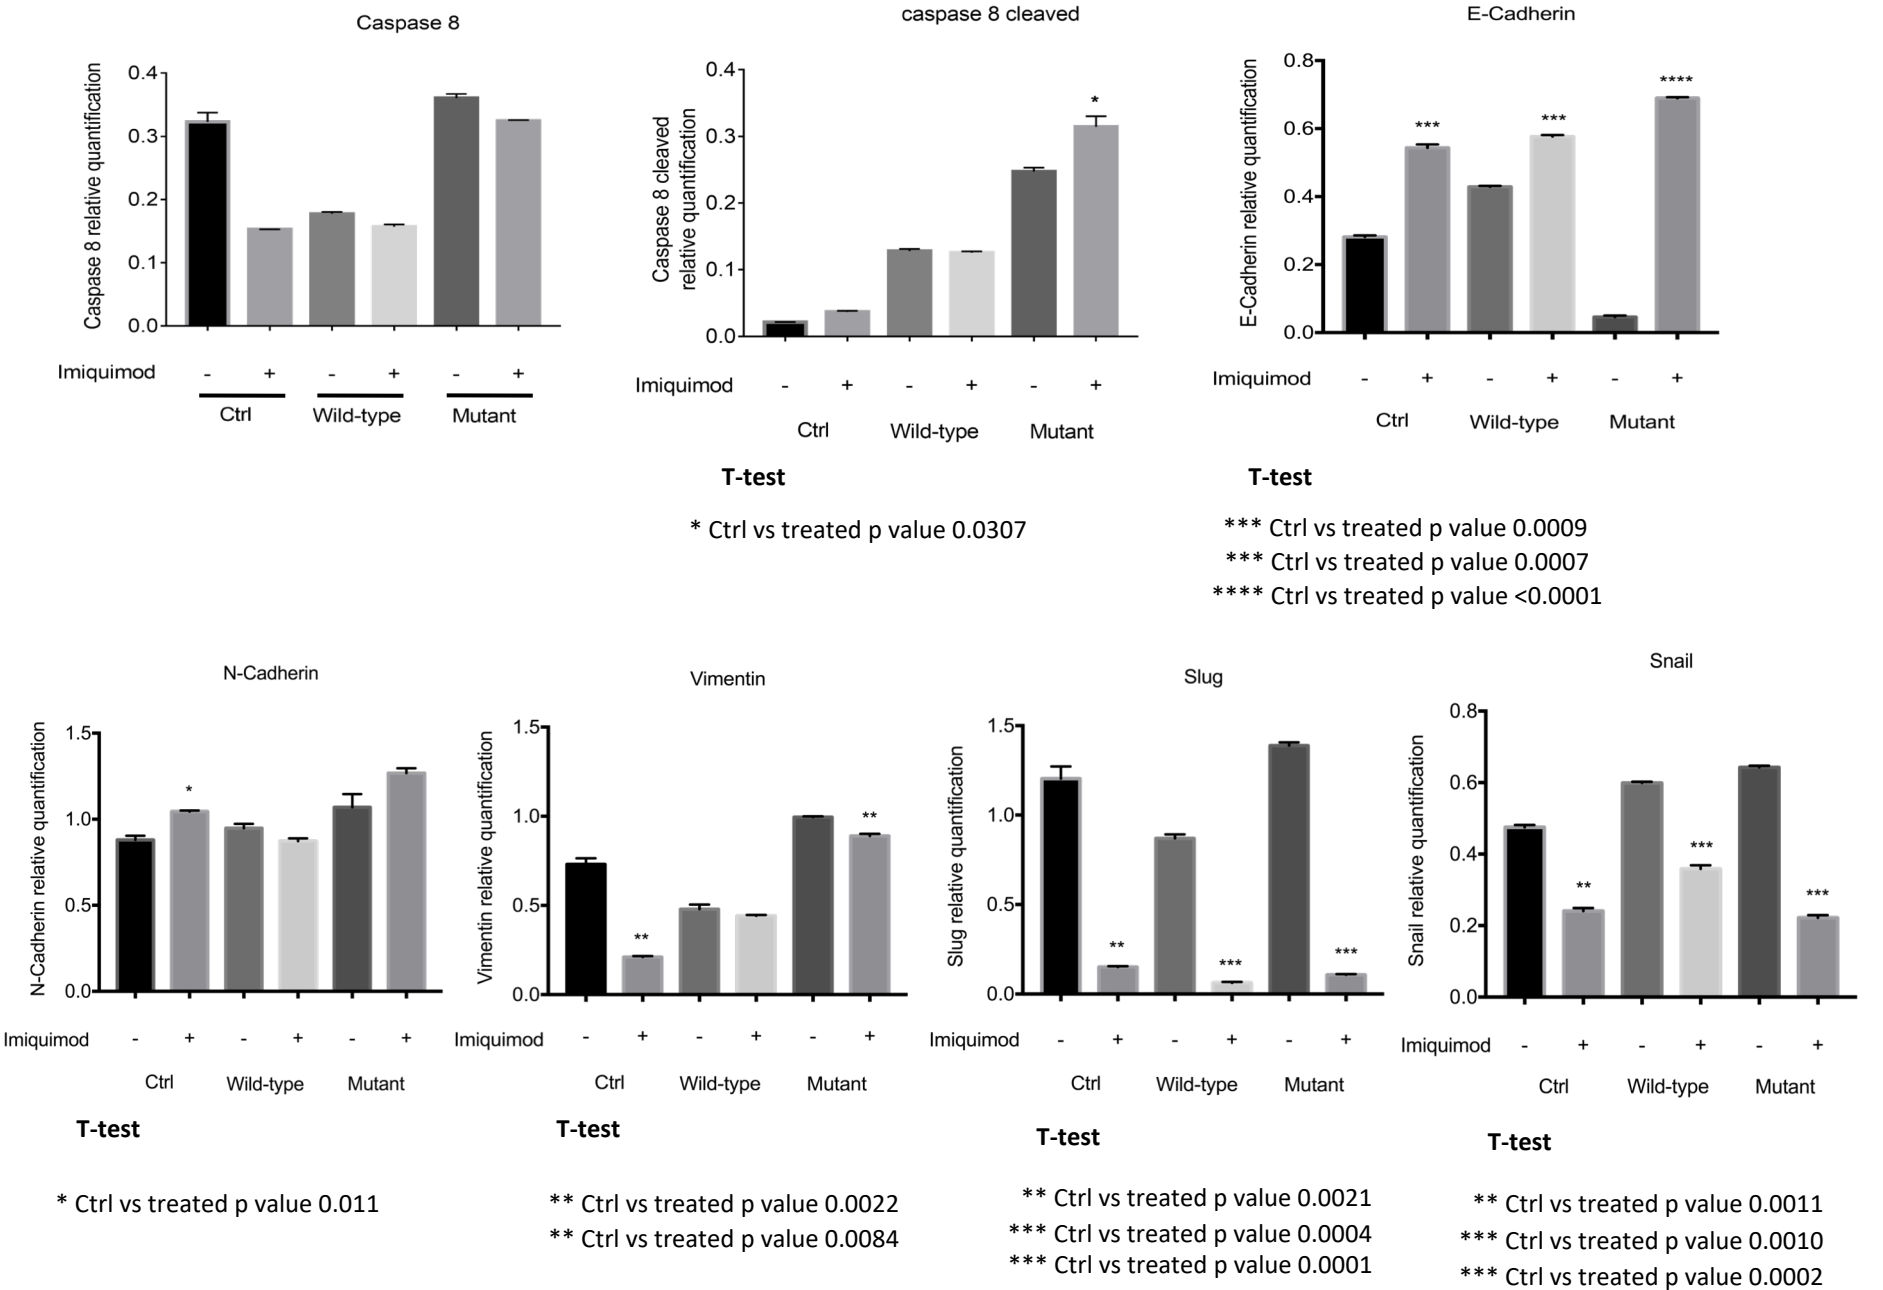

**Figure 4** **Tumor xenografts in nude mice**

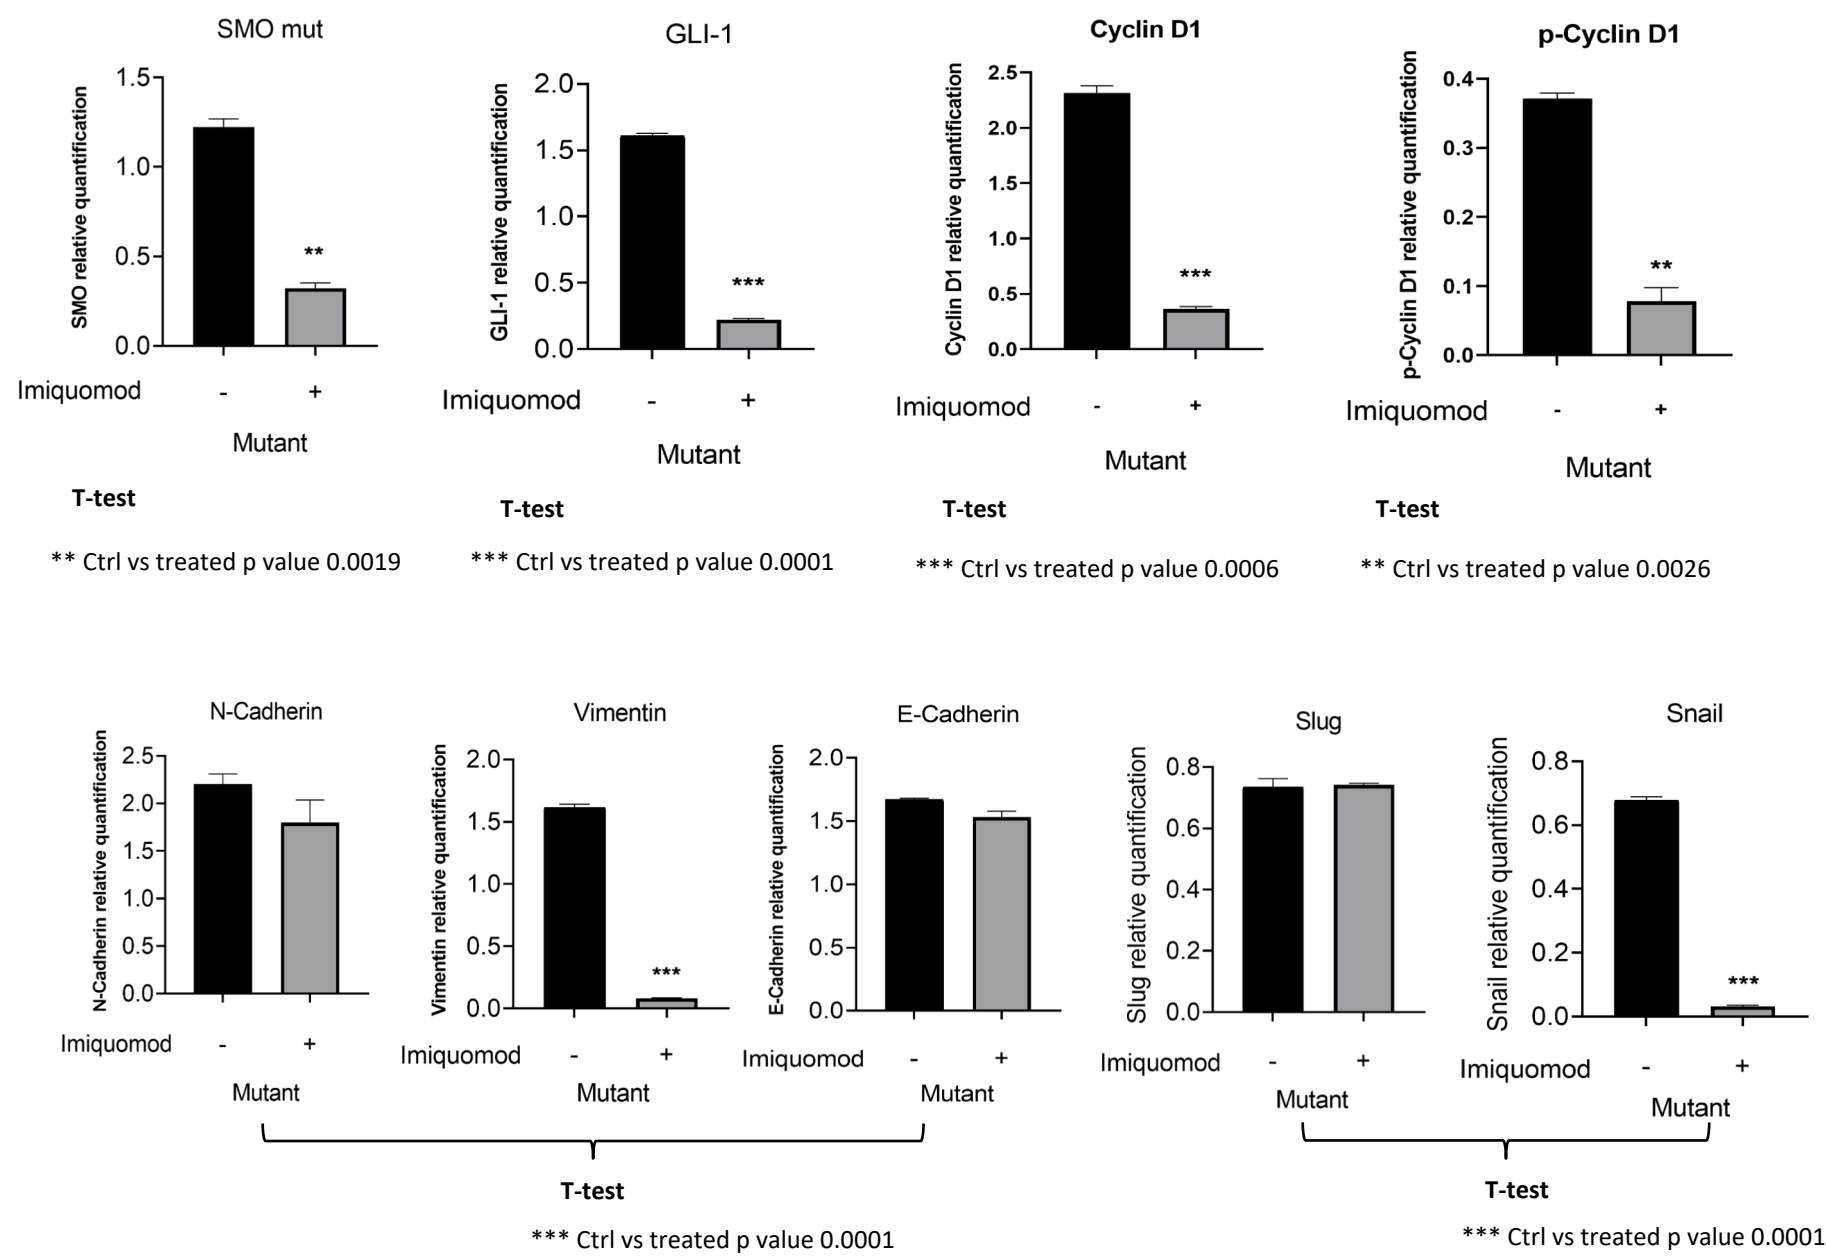

Supplement: s1 [file s1]
